# Supplementary material
Source: publisher figshare collection journal article supplement (https://karger.figshare.com/ndownloader/files/28747272)
Supplement: Supplementary file 1 [file 28747272]

| Supplementary table 1. Sequence of primer pairs | |
| --- | --- |
| primer | sequence(5'-3') |
| IGF-1 | F-GGACCAGAGACCCTTTGCGGGG |
| R-GGCTGCTTTTGTAGGCTTCAGGTGG |
| Beta-actin | F-CTGAATGGCCCAGGTCTGA |
| R-CCCTGGCTGCCTCAACAC |
| GHR | F-GCCTGGGGACAAGTTCTTCTG |
| R-GCAGCTTGTCGTTGGCTTTCC |
| CLOCK | F-TCTACAgAAgAgCATTgATTTTTTgC |
| R-TCATTACTAAggAATgTgggTTTCC |
| PER1 | F-CCgAATACACACTTCgAAACCAg |
| R-TCCCgTTTgCAACgCAg |
| REV-ERBα | F-CCCTggACTCCAATAACAACACA |
| R-gCCATTggAgCTgTCACTgTAg |
| PGC-1α | F-AGCCGTGACCACTGACAACGAG |
| R-GCTGCATGGTTCTGAGTGCTAAG |
| PPAR α | F-TCGAGGAAGGCACTACACCT |
| R-CCAGGCTACAGTGGGACATT |
| BMAL1 | F-CgTTTCTCgACACgCAATAgAT |
| R-TCCTgTggTAgATACgCCAAAA |
| CRY1 | F-CCCTgTgggTTTTggTAggA |
| R-TgCAgggAAgCCTCTTAggA |
| G6P | F-cgactcgctatctccaagtga |
| R-gttgaaccagtctccgacca |
| FASN | F-ggaggtggtgatagccggtat |
| R-tgggtaatccatagagcccag |
| SREBF1 | F-GGAGCCATGGATTGCACATT |
| R-GCTTCCAGAGAGGAGGCCAG |
| GH | F-ACTGCTTGGCAATGGCTAC |
| R-ATCTTCCAGCTCCTGCATC |
| PEPCK | F-TGCGGATCATGACTCGGATG |
| R-AGGCCCAGTTGTTGACCAAA |
| GHRHR | F-ACCCGTATCCTCTGCTTGCT |
| R-AGGTGTTGTTGGTCCCCTCT |
| GHSR | F-TCAGGGACCAGAACCACAAA |
| R-CCAGCAGAGGATGAAAGCAA |
| SSTR2 | F-GGCGTGGTACACAGGTTTC |
| R-GAAGACAGCCACTACGATGG |
